# Supplementary material for: From one-pot stabilisation to in situ functionalisation in nitroxide mediated polymerisation: an efficient extension towards atom transfer radical polymerisation
Source: Royal Society of Chemistry journal article supplement (doi:10.1039/c2py00444e), 2012-01-01
Supplement: c2py00444e.pdf [file c2py00444e.pdf]

# From One-Pot Stabilisation to In Situ Functionalisation in Nitroxide Mediated Polymerisation: An Efficient Extension towards Atom Transfer Radical Polymerisation

Lionel Petton, Andrés E. Ciolino, Bart Dervaux, and Filip E. Du Prez\*

Polymer Chemistry Research Group, Department of Organic Chemistry, Ghent University, Krijgslaan 281 S4  
9000 Gent (Belgium), Filip.DuPrez@UGent.be

## SUPPORTING INFORMATION

### Thiols

**Table S1** Experiments for one-pot removal of nitroxides from NMP polymers with thiols<sup>a</sup>.

| Entry | M <sup>b</sup>   | Initiation <sup>c</sup> | DP <sup>d</sup> | T (K) | Thiol           | Eq. <sup>e</sup> | t <sub>i</sub> – t <sub>f</sub> <sup>f</sup><br>(min) | M <sub>n,i</sub> – M <sub>n,f</sub> <sup>g</sup><br>(g.mol <sup>-1</sup> ) | PDI <sub>i</sub> – PDI <sub>f</sub> <sup>h</sup> |
|-------|------------------|-------------------------|-----------------|-------|-----------------|------------------|-------------------------------------------------------|----------------------------------------------------------------------------|--------------------------------------------------|
| 1     | S                | AIBN / SG1 (1 / 2)      | 412             | 393   | 1-dodecanethiol | 1                | 180 – 240                                             | 33,300 – 12,700                                                            | 1.21 – 2.81                                      |
| 2     | MMA <sup>i</sup> | MAMA-SG1 <sup>j</sup>   | 244             | 363   | 1-dodecanethiol | 10               | 120 – 180                                             | 12,100 – 2,900                                                             | 1.51 – 3.87                                      |
| 3     | MMA <sup>i</sup> | MAMA-SG1 <sup>j</sup>   | 240             | 363   | thiophenol      | 10               | 120 – 180                                             | 13,600 – 5,000                                                             | 1.41 – 3.33                                      |
| 4     | iBA              | MAMA-SG1 <sup>j</sup>   | 245             | 393   | thiophenol      | 10               | 60 – 120                                              | 9,800 – 3,400                                                              | 1.34 – 3.32                                      |
| 5     | S                | AIBN / TEMPO (1 / 2)    | 233             | 408   | 1-dodecanethiol | 1                | 180 – 210                                             | 5,700 – 3,200                                                              | 1.22 – 1.88                                      |

<sup>a</sup> A typical reaction procedure is given below for entry 1. <sup>b</sup> M = monomer. <sup>c</sup> initiator / nitroxide molar ratio is given between brackets for bimolecular systems. <sup>d</sup> Theoretical degree of polymerisation at 100% conversion. <sup>e</sup> Thiol equivalents compared to the nitroxide. <sup>f</sup> t<sub>i</sub> = thiol injection time; t<sub>f</sub> = final reaction time. <sup>g</sup> M<sub>n,i</sub> = molar mass just before thiol injection; M<sub>n,f</sub> = molar mass at the end of the reaction. <sup>h</sup> PDI<sub>i</sub> = PDI just before thiol injection; PDI<sub>f</sub> = PDI at the end of the reaction. <sup>i</sup> 8.8 mol% of S was added to ensure control over the polymerisation. <sup>j</sup> 10 mol% of SG1 was added to improve control over the polymerisation.

#### 1: NMP of styrene and nitroxide removal in the presence of 1-dodecanethiol

Styrene (3 mL, 2.61 x 10<sup>-2</sup> mol), SG1 (0.01713 g, 5.81 x 10<sup>-5</sup> mol) and AIBN (0.00520 g, 3.17 x 10<sup>-5</sup> mol) were introduced in a 5 mL glass vial equipped with a magnetic bar and stirred gently during 30 min. In another 1 mL vial, 0.15 mL of 1-dodecanethiol (0.12675 g, 6.27 x 10<sup>-4</sup> mol, 10.8 equivalents with respect to SG1) was degassed under argon.

The mixture of monomer, SG1 and AIBN was then transferred into a Schlenk vessel and degassed by three freeze-pump-thaw cycles. Subsequently, the vessel was backfilled with nitrogen gas and the reaction mixture was immersed in an oil bath, which was preheated at 393 K (the pale red colour of the original reaction mixture disappeared in a few minutes). Time  $t_0$  for the beginning of the reaction was arbitrary taken 5 min after immersion in the oil bath to allow for thermal equilibration. For kinetic analyses, samples were withdrawn from the reactor under nitrogen at 30 min intervals. The monomer conversion was determined by  $^1\text{H}$  NMR analysis on crude samples dissolved in  $\text{CDCl}_3$ . Molecular weights were determined by size exclusion chromatography (SEC).

After 180 min of reaction, a crude sample from the reaction mixture was cooled, diluted with THF and precipitated into an excess of methanol. Just after that, 1-dodecanethiol was added to the remaining reaction mixture and sampling was performed 10 min, 30 min and 1h after addition. The crude reaction mixture was cooled with ice, diluted with THF, and precipitated into an excess of chilled methanol. The resulting polymer was isolated by filtration and dried under vacuum ( $10^{-2}$  mmHg) at 298 K for 2 h to yield a dry powder.

## 2: NMP of MMA and nitroxide removal in the presence of 1-dodecanethiol

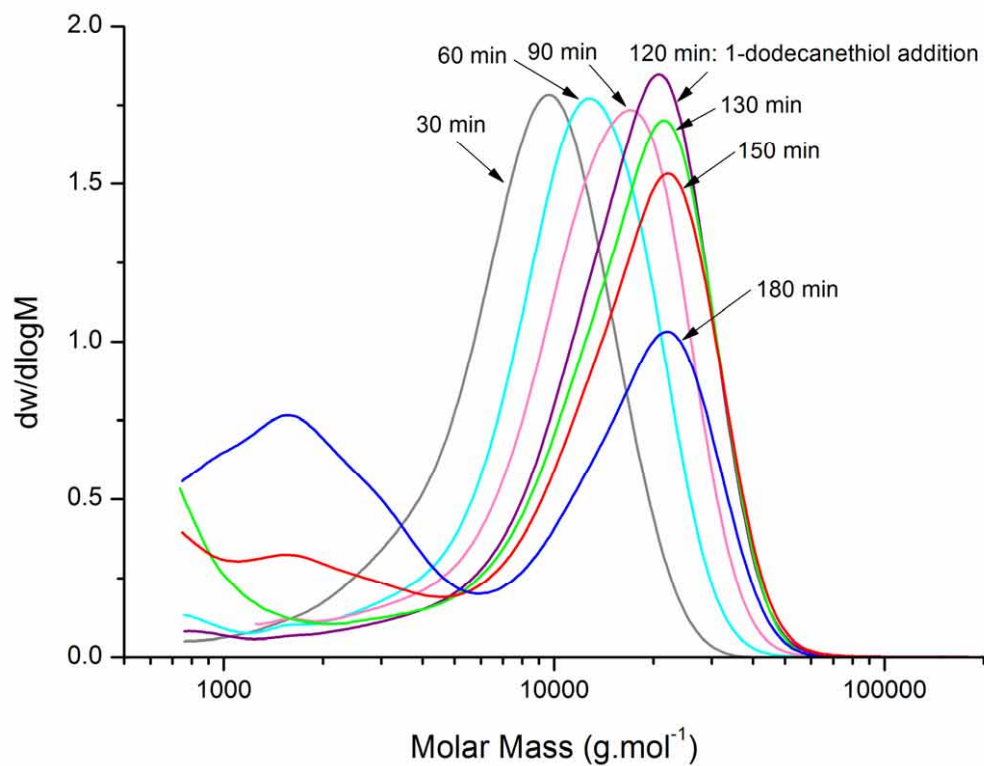

**Figure S1** Evolution of molar mass distribution for PMMA synthesised by NMP and one-pot SG1 removal with 1-dodecanethiol (entry 2, Table S1).

### 3: NMP of MMA and nitroxide removal in the presence of thiophenol

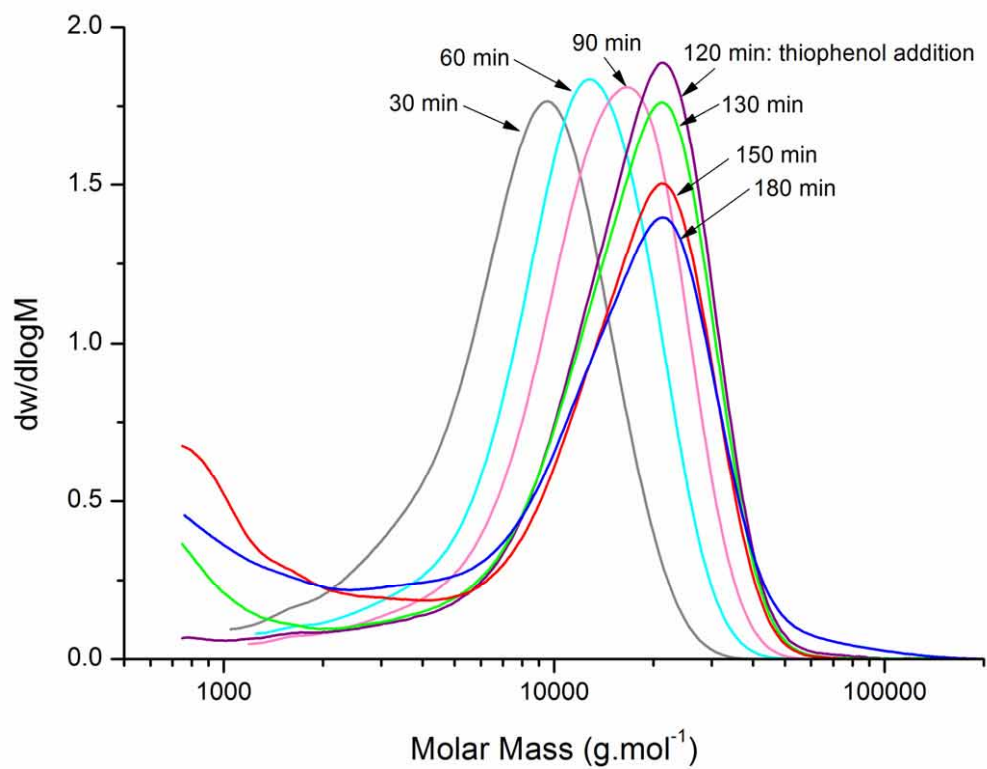

**Figure S2** Evolution of molar mass distribution for PMMA synthesised by NMP and one-pot SG1 removal with thiophenol (entry 3, Table S1).

4: NMP of iBA and nitroxide removal in the presence of thiophenol

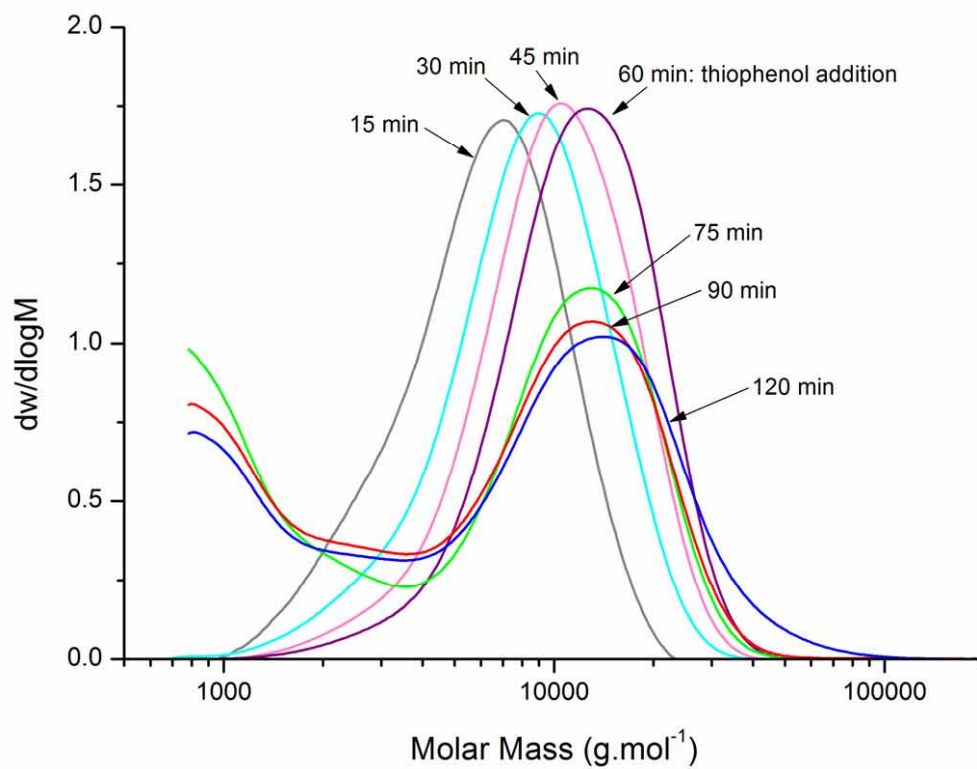

**Figure S3** Evolution of molar mass distribution for PiBA synthesised by NMP and one-pot SG1 removal with thiophenol (entry 4, Table S1).

5: NMP of styrene and nitroxide removal in the presence of 1-dodecanethiol

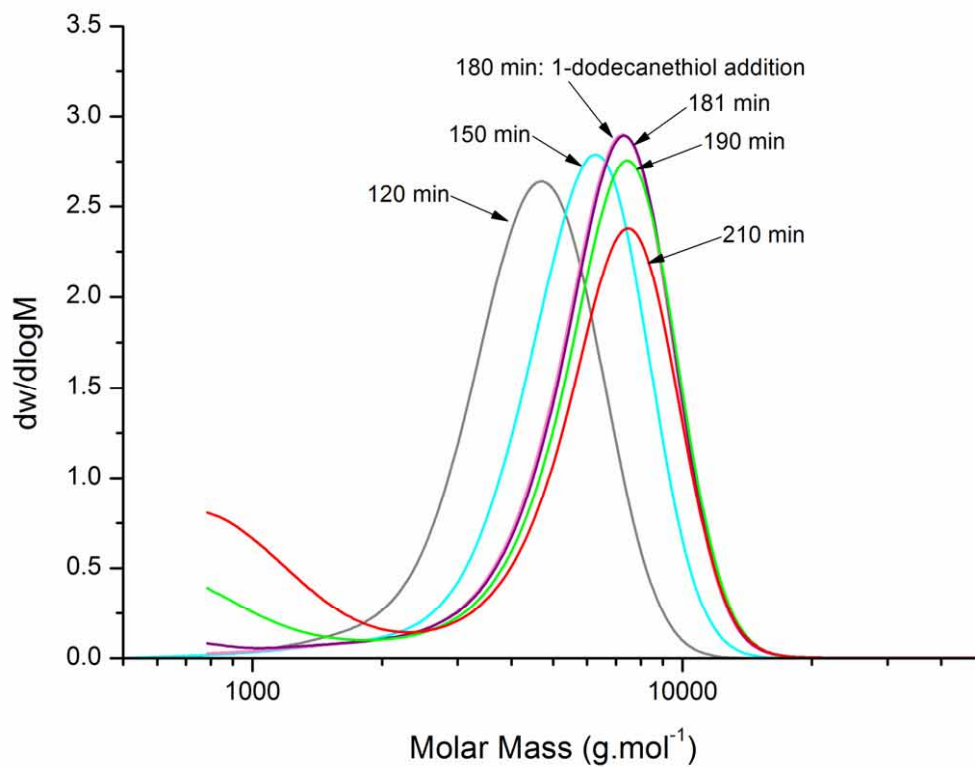

**Figure S4** Evolution of molar mass distribution for PS synthesised by NMP and one-pot TEMPO removal with 1-dodecanethiol (entry 5, Table S1).

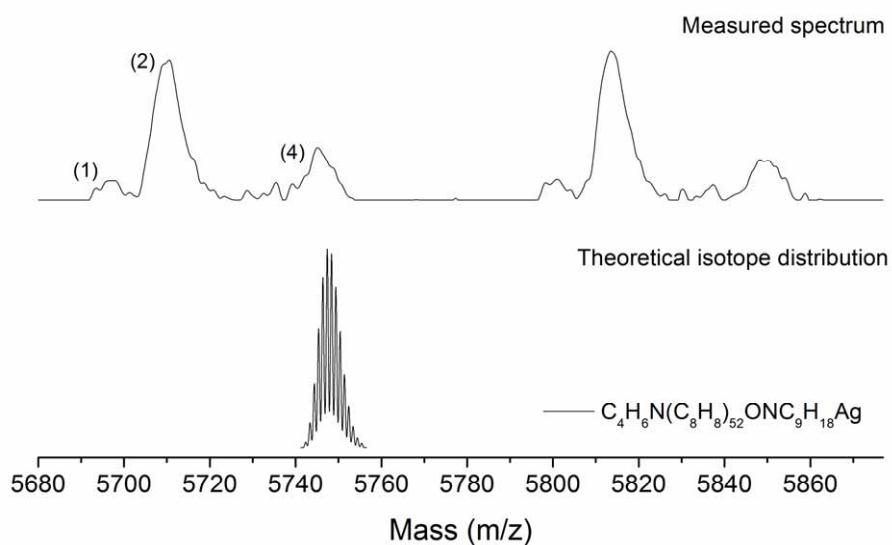

**Figure S5** Comparison of measured MALDI-TOF spectrum of entry 5 in Table S1 before the addition of 1-dodecanethiol (top) and theoretical isotope distribution of  $C_4H_6N(C_8H_8)_{52}ONC_9H_{18}Ag$  (bottom).

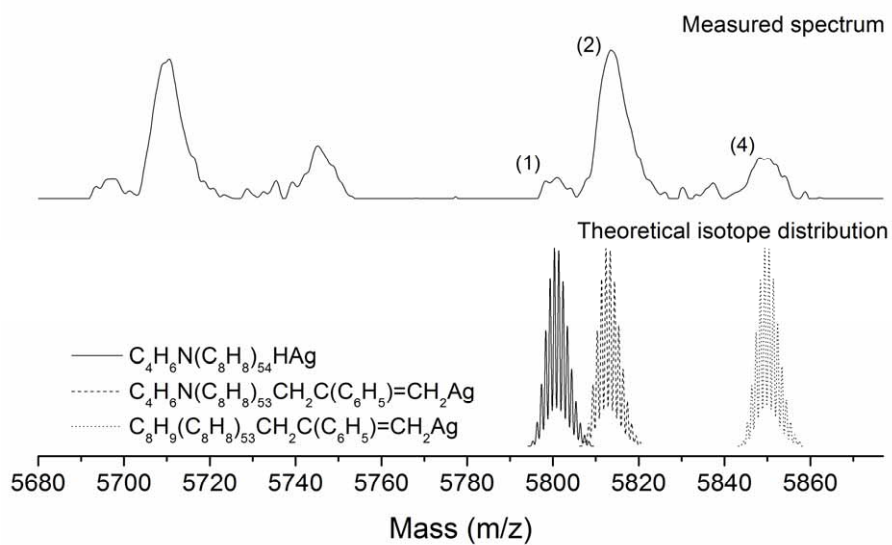

**Figure S6** Comparison of measured MALDI-TOF spectrum of entry 5 in Table S1 before the addition of 1-dodecanethiol (top) and theoretical isotope distribution of  $C_4H_6N(C_8H_8)_{54}HAg$ ,  $C_4H_6N(C_8H_8)_{53}CH_2C(C_6H_5)=CH_2Ag$ , and  $C_8H_9(C_8H_8)_{53}CH_2C(C_6H_5)=CH_2Ag$  (bottom).

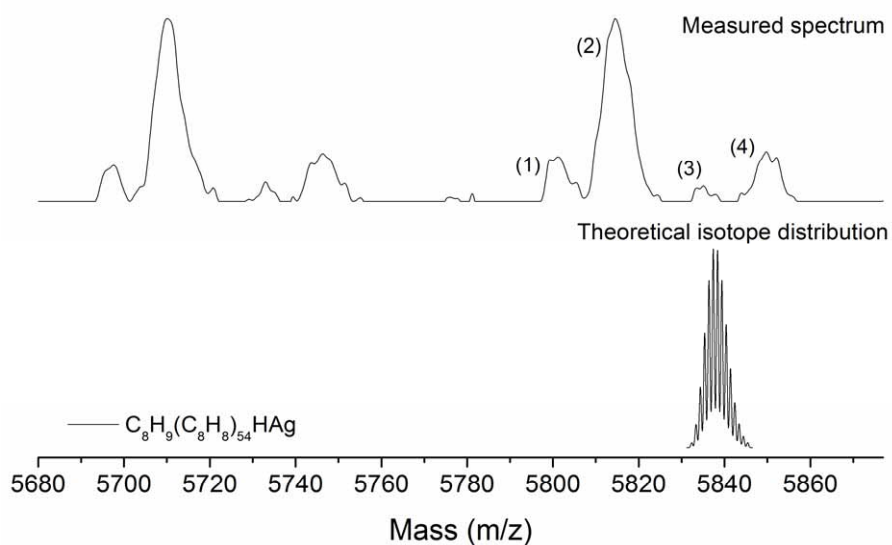

**Figure S7** Comparison of measured MALDI-TOF spectrum of entry 5 in Table S1 1 min after the addition of 1-dodecanethiol (top) and theoretical isotope distribution of  $C_8H_9(C_8H_8)_{54}HAg$  (bottom).

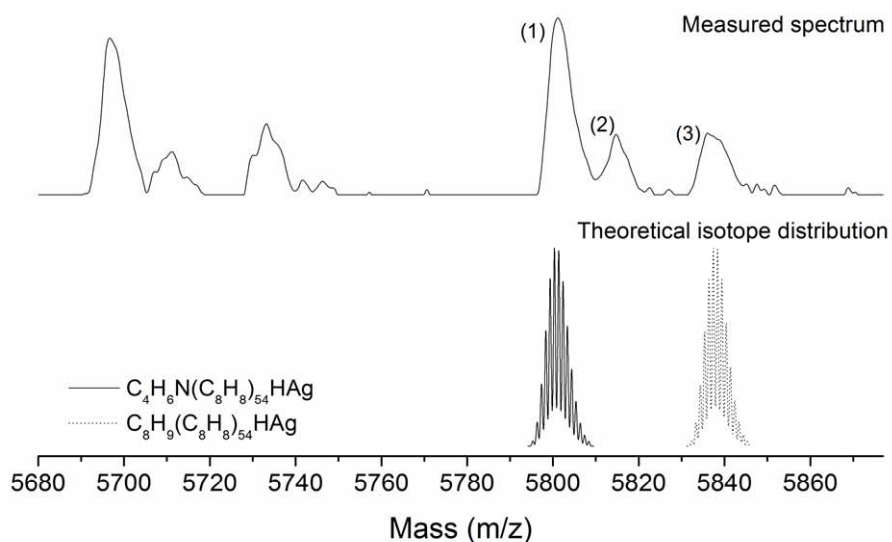

**Figure S8** Comparison of measured MALDI-TOF spectrum of entry 5 in Table S1 10 min after the addition of 1-dodecanethiol (top) and theoretical isotope distribution of  $C_4H_6N(C_8H_8)_{54}HAg$ , and  $C_8H_9(C_8H_8)_{54}HAg$  (bottom).

Remark on the theoretical isotope distributions of thermally initiated polymers that only one of the two distributions has been simulated. The other series that is 2 Da lower has not been presented.



## Radical Initiators

**Table S2** Experiments for one-pot removal of nitroxides from NMP polymers with radical sources<sup>a</sup>.

| Entry           | DP <sup>b</sup> | Radical Source | Eq. <sup>c</sup> | $t_i - t_f^d$<br>(min) | $M_{n,i} - M_{n,f}^e$<br>(g.mol <sup>-1</sup> ) | PDI <sub>i</sub> - PDI <sub>f</sub> <sup>f</sup> |
|-----------------|-----------------|----------------|------------------|------------------------|-------------------------------------------------|--------------------------------------------------|
| 6               | 446             | BPO            | 10               | 180 – 240              | 33,300 – 5,000                                  | 1.23 – 5.32                                      |
| 7               | 476             | AIBN           | 10               | 180 – 240              | 31,500 – 6,500                                  | 1.23 – 4.33                                      |
| 8               | 446             | AIBN           | 2                | 180 – 240              | 34,800 – 20,100                                 | 1.27 – 2.18                                      |
| 9               | 443             | AIBN           | 4                | 180 – 240              | 38,000 – 15,300                                 | 1.28 – 2.76                                      |
| 10              | 428             | AIBN           | 10               | 900 – 1440             | 55,400 – 60,700                                 | 1.49 – 1.41                                      |
| 11 <sup>g</sup> | 379             | AIBN           | 10               | 900 – 1440             | 41,900 – 36,200                                 | 1.74 – 1.74                                      |

<sup>a</sup> Monomer: styrene; initiation: AIBN / SG1 (molar ratio = 1 / 2); temperature: 393 K (A typical reaction procedure is given below for entry 6). <sup>b</sup> Theoretical degree of polymerisation at 100% conversion. <sup>c</sup> Radical source equivalents compared to the nitroxide. <sup>d</sup>  $t_i$  = radical source injection time;  $t_f$  = final reaction time. <sup>e</sup>  $M_{n,i}$  = molar mass just before radical source injection;  $M_{n,f}$  = molar mass at the end of the reaction. <sup>f</sup> PDI<sub>i</sub> = PDI just before radical source injection; PDI<sub>f</sub> = PDI at the end of the reaction. <sup>g</sup> 50 vol% of *o*-xylene was also added.

### 6: NMP of styrene and nitroxide removal in the presence of BPO

Styrene (3 mL,  $2.61 \times 10^{-2}$  mol), SG1 (0.01676 g,  $5.68 \times 10^{-5}$  mol), and AIBN (0.00450 g,  $2.74 \times 10^{-5}$  mol) were introduced in a 5 mL glass vial equipped with a magnetic bar and stirred gently during 30 min. In another 1 mL vial, 0.17717 g of BPO ( $5.49 \times 10^{-4}$  mol, 9.66 equivalents with respect to SG1) were dissolved in a minimal amount of *o*-xylene necessary for complete dissolution of BPO and the solution was degassed under argon.

The mixture of monomer, SG1 and BPO was then transferred into a Schlenk vessel and degassed by three freeze-pump-thaw cycles. Subsequently, the vessel was backfilled with nitrogen gas and the reaction mixture was immersed in an oil bath, which was preheated at 393 K (the pale red colour of the original reaction mixture disappeared in a few minutes). Time  $t_0$  for the beginning of the reaction was arbitrary taken 5 min after immersion in the oil bath to allow for thermal equilibration. For kinetic analyses, samples were withdrawn from the reactor under nitrogen at 30 min intervals. The monomer conversion was determined by <sup>1</sup>H NMR analysis on crude samples dissolved in CDCl<sub>3</sub>. Molecular weights were determined by size exclusion chromatography (SEC).

After 180 min of reaction, a crude sample from the reaction mixture was cooled, diluted with THF and precipitated into an excess of methanol. Just after that, the BPO

solution was added to the remaining reaction mixture and sampling was performed 10 min, 30 min and 1h after addition. A highly viscous media was observed 40 min after BPO addition. The crude reaction mixture was cooled with ice, diluted with THF and precipitated into an excess of chilled methanol. The resulting polymer was isolated by filtration and dried under vacuum ( $10^{-2}$  mmHg) at 298 K for 2 h to yield a dry powder.

7: NMP of styrene and nitroxide removal in the presence of AIBN

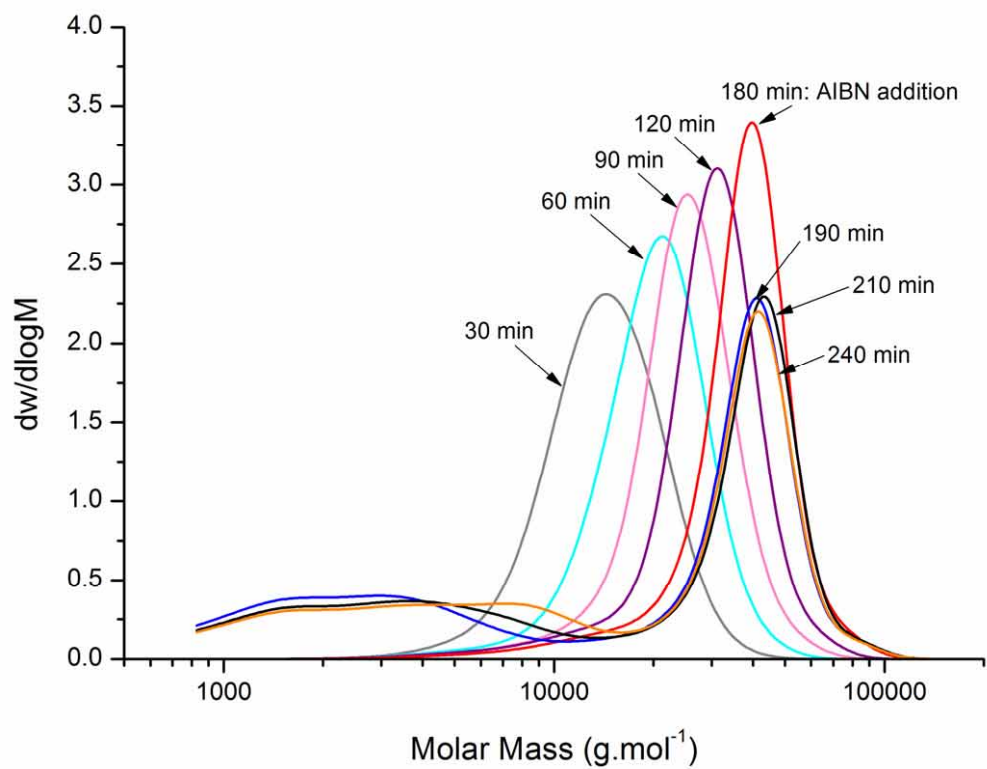

**Figure S9** Evolution of molar mass distribution for PS synthesised by NMP and one-pot SG1 removal with AIBN (entry 7, Table S2).

**8: NMP of styrene and nitroxide removal in the presence of AIBN**

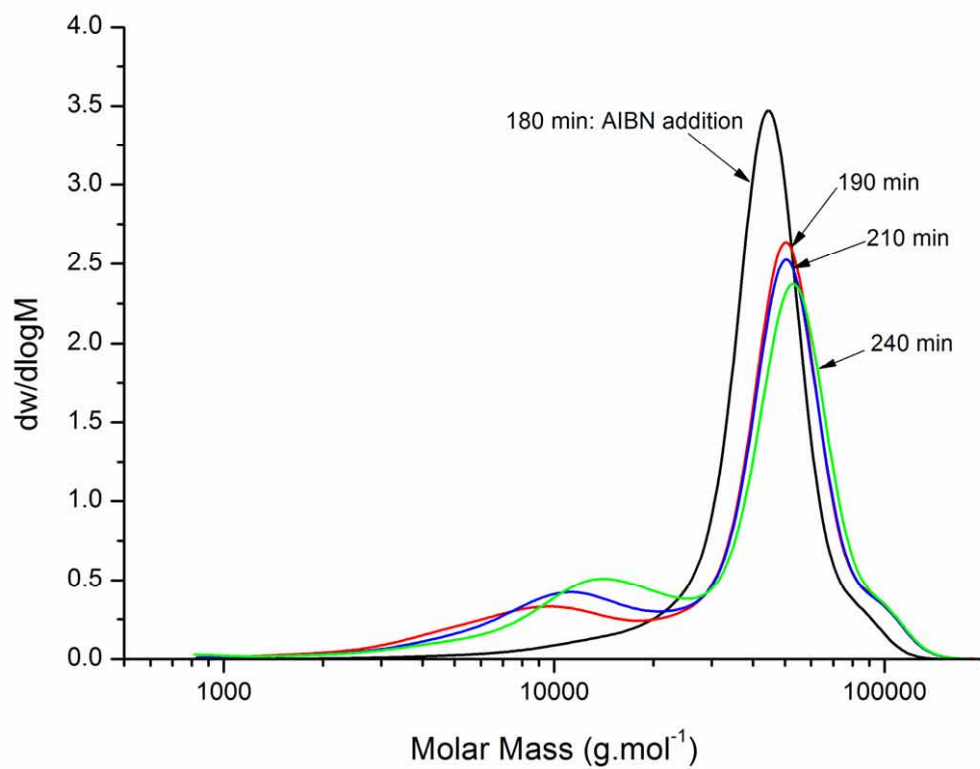

**Figure S10** Evolution of molar mass distribution for PS synthesised by NMP and one-pot SG1 removal with AIBN (entry 8, Table S2).

9: NMP of styrene and nitroxide removal in the presence of AIBN

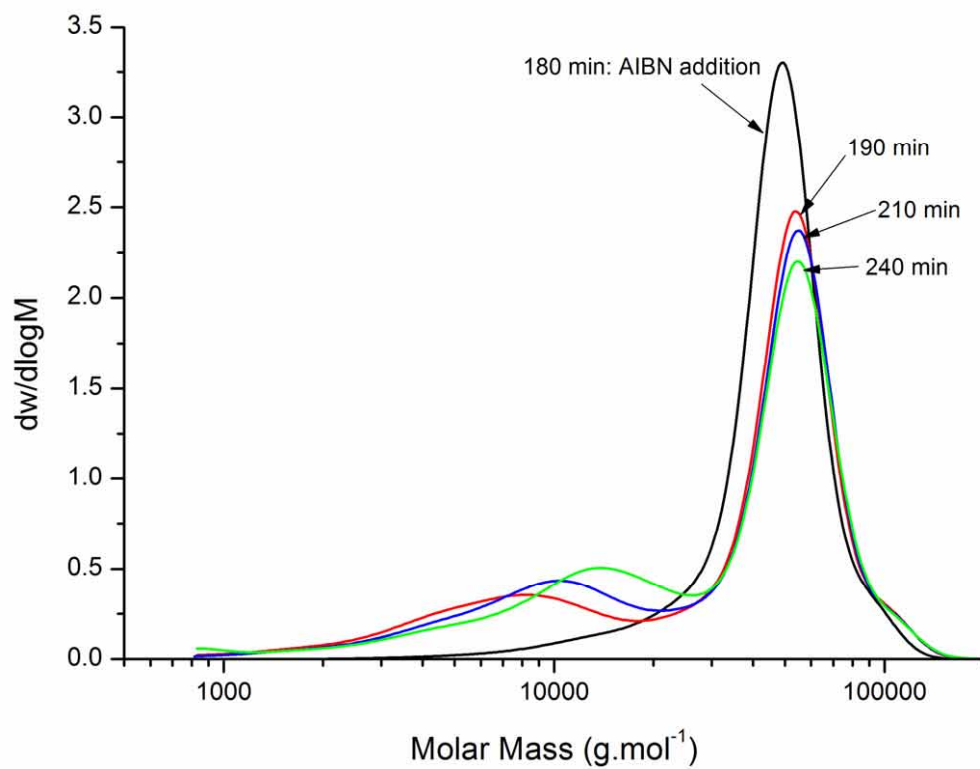

**Figure S11** Evolution of molar mass distribution for PS synthesised by NMP and one-pot SG1 removal with AIBN (entry 9, Table S2).

11: NMP of styrene and nitroxide removal in the presence of AIBN

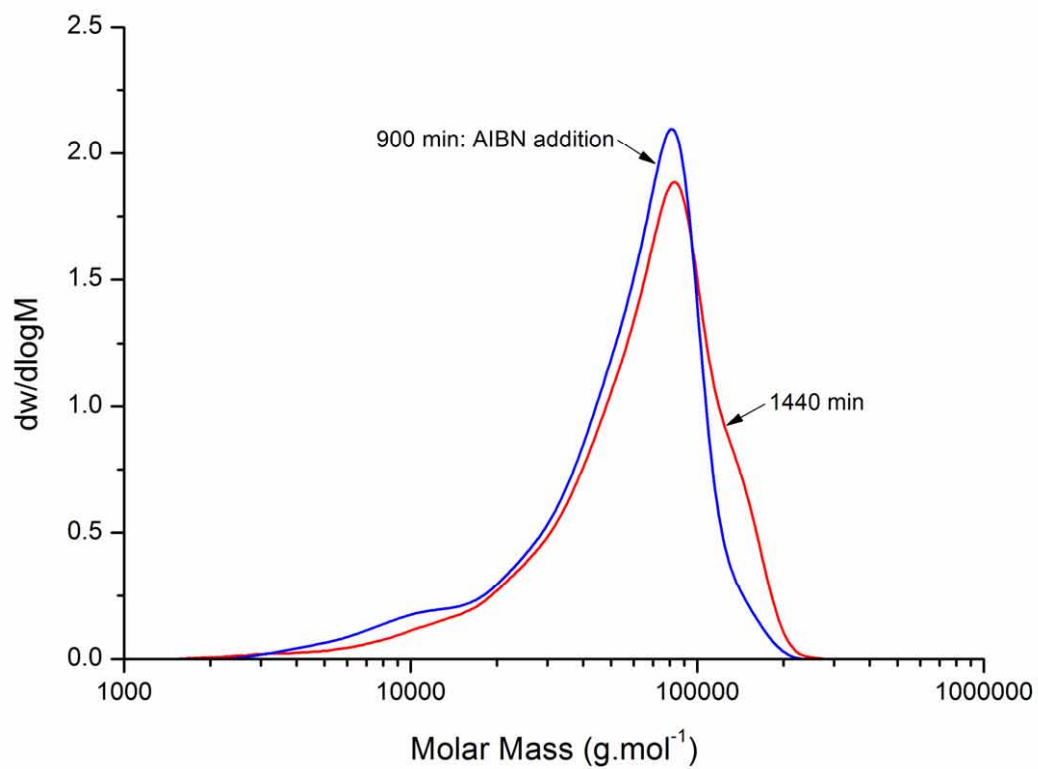

**Figure S12** Evolution of molar mass distribution for PS synthesised by NMP and one-pot SG1 removal with AIBN (entry 11, Table S2).

## Halogen: CBr<sub>4</sub>

Table S3 Experiments for one-pot removal of nitroxides from NMP polymers with CBr<sub>4</sub><sup>a</sup>.

| Entry | M <sup>b</sup>   | Initiation <sup>c</sup> | DP <sup>d</sup> | T (K) | CBr <sub>4</sub> Eq. <sup>e</sup> | t <sub>i</sub> – t <sub>f</sub> <sup>f</sup> (min) | M <sub>n,i</sub> – M <sub>n,f</sub> <sup>g</sup> (g.mol <sup>-1</sup> ) | PDI <sub>i</sub> – PDI <sub>f</sub> <sup>h</sup> |
|-------|------------------|-------------------------|-----------------|-------|-----------------------------------|----------------------------------------------------|-------------------------------------------------------------------------|--------------------------------------------------|
| 12    | S                | AIBN / SG1 (1 / 2)      | 468             | 393   | 10                                | 180 – 240                                          | 32,300 – 25,600                                                         | 1.24 – 1.58                                      |
| 13    | S                | AIBN / SG1 (1 / 2)      | 95              | 393   | 1                                 | 180 – 190                                          | 9,400 – 9,500                                                           | 1.19 – 1.20                                      |
| 14    | S                | AIBN / SG1 (1 / 3)      | 71              | 393   | 1                                 | 240 – 250                                          | 3,500 – 3,600                                                           | 1.11 – 1.18                                      |
| 15    | iBA              | AIBN / SG1 (1 / 2)      | 49              | 393   | 1                                 | 360 – 370                                          | 4,700 – 5,200                                                           | 1.15 – 1.10                                      |
| 16    | MMA <sup>i</sup> | MAMA-SG1 <sup>j</sup>   | 86              | 363   | 1                                 | 120 – 130                                          | 5,700 – 4,900                                                           | 1.30 – 1.51                                      |

<sup>a</sup> A typical reaction procedure is given below for 12. <sup>b</sup> M = monomer. <sup>c</sup> initiator / nitroxide molar ratio is given between brackets for bimolecular systems. <sup>d</sup> Theoretical degree of polymerisation at 100% conversion. <sup>e</sup> CBr<sub>4</sub> equivalents compared to the nitroxide. <sup>f</sup> t<sub>i</sub> = CBr<sub>4</sub> injection time; t<sub>f</sub> = final reaction time. <sup>g</sup> M<sub>n,i</sub> = molar mass just before CBr<sub>4</sub> injection; M<sub>n,f</sub> = molar mass at the end of the reaction. <sup>h</sup> PDI<sub>i</sub> = conversion just before CBr<sub>4</sub> injection; PDI<sub>f</sub> = conversion at the end of the reaction. <sup>i</sup> 8.8 mol% of S was added to ensure control over the polymerisation. <sup>j</sup> 10 mol% of SG1 was added to improve control over the polymerisation.

Remark: MALDI-TOF analysis was not performed on the end-products due to the weakness of the C-Br bond, which tend to be cleaved easily (N. K. Singha, S. Rimmer and B. Klumperman, *Eur. Polym. J.*, 2004, **40**, 159-163).

### 12: NMP of styrene and nitroxide removal in the presence of CBr<sub>4</sub>

Styrene (3 mL, 2.61 x 10<sup>-2</sup> mol), SG1 (0.01602 g, 5.43 x 10<sup>-5</sup> mol) and AIBN (0.00457 g, 2.79 x 10<sup>-5</sup> mol) were introduced in a 5 mL glass vial equipped with a magnetic bar and stirred gently during 30 min. In another 1 mL vial, 0.18058 g of CBr<sub>4</sub> (5.44 x 10<sup>-4</sup> mol, 10 equivalents with respect to SG1) were dissolved in 0.2 mL of *o*-xylene and degassed under argon.

The mixture of monomer, SG1 and AIBN was then transferred into a Schlenk vessel and degassed by three freeze-pump-thaw cycles. Subsequently, the vessel was backfilled with nitrogen gas and the reaction mixture was immersed in an oil bath, which was pre-heated at 393 K (the pale red colour of the original reaction mixture disappeared in a few minutes). Time t<sub>0</sub> for the beginning of the reaction was arbitrary taken 5 min after immersion in the oil bath to allow for thermal equilibration. For kinetic analyses, samples were withdrawn from the reactor under nitrogen at 30 min intervals. The monomer conversion was determined by <sup>1</sup>H NMR analysis on crude samples dissolved in CDCl<sub>3</sub>. Molecular weights were determined by size exclusion chromatography (SEC).

After 180 min of reaction, a crude sample from the reaction mixture was cooled, diluted with THF and precipitated into an excess of methanol. After that, the  $\text{CBr}_4$  solution was added to the remaining reaction mixture and sampling was performed 10 min, 30 min and 1h after addition. After the  $\text{CBr}_4$  addition the reaction mixture became pale yellow and turned brown at the end of the reaction. The crude reaction mixture was cooled with ice, diluted with THF and precipitated into an excess of chilled methanol. The resulting polymer was isolated by filtration and dried under vacuum ( $10^{-2}$  mmHg) at 298 K for 2 h to yield a dry powder.

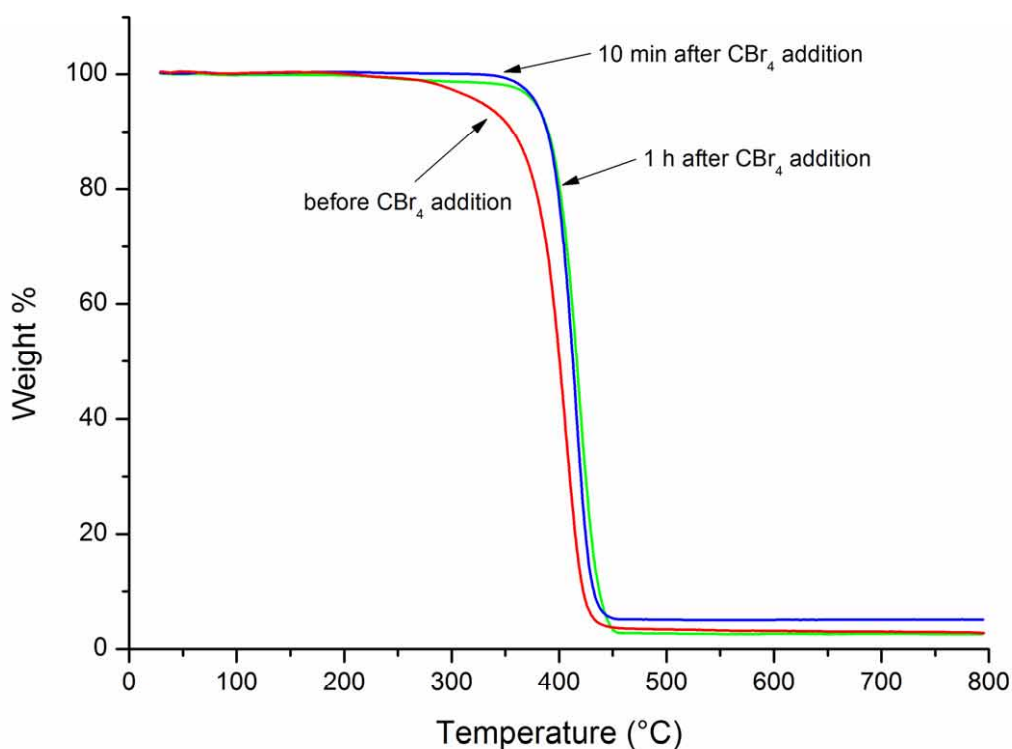

**Figure S13** TGA before, 10 min and 1h after  $\text{CBr}_4$  addition for PS synthesised with SG1 (entry 12, Table S3).



13: NMP of styrene and nitroxide removal in the presence of CBr<sub>4</sub>

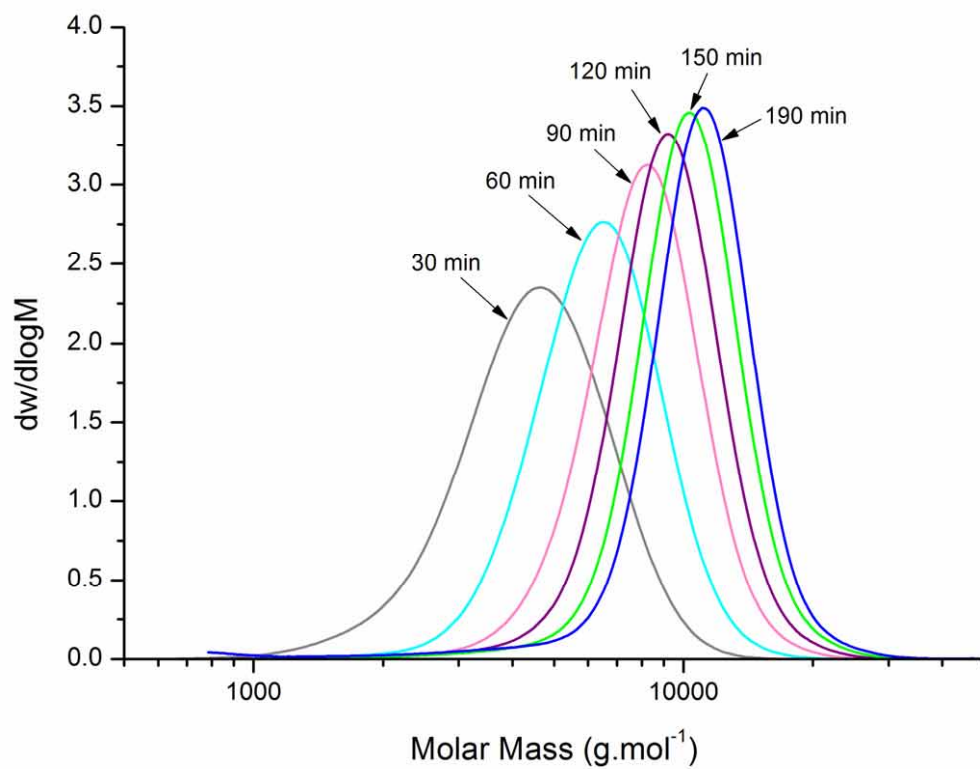

**Figure S14** Evolution of molar mass distribution for PS synthesised by NMP and one-pot SG1 removal with CBr<sub>4</sub> (entry 13, Table S3). Trace at 180 min corresponding to CBr<sub>4</sub> addition is not shown here.

14: NMP of styrene and nitroxide removal in the presence of  $\text{CBr}_4$

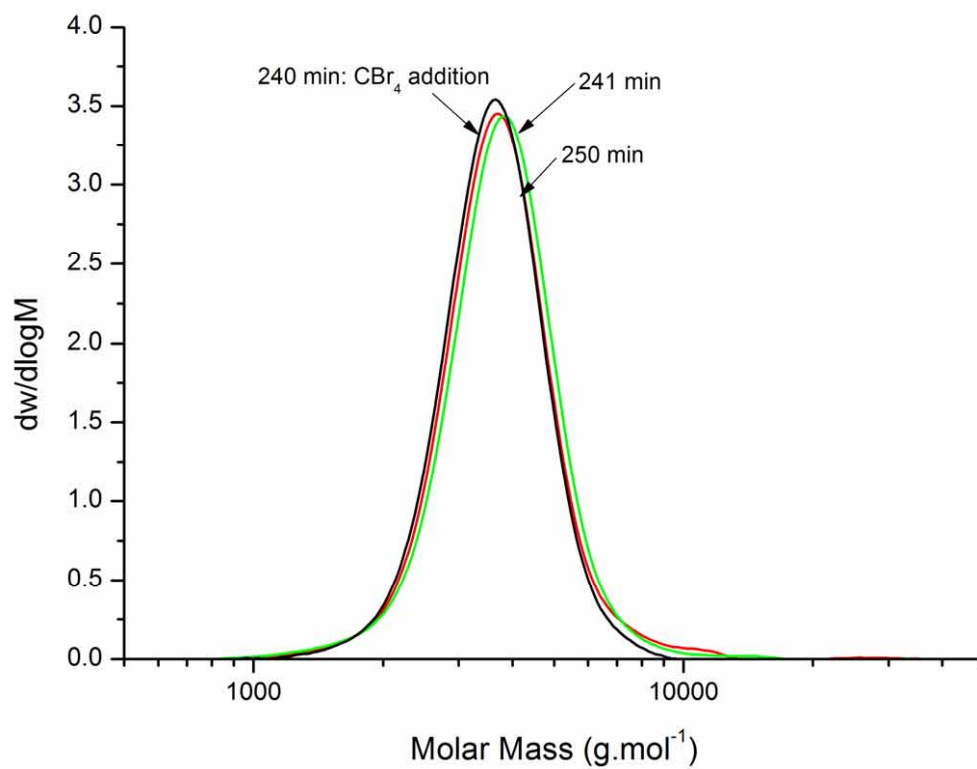

**Figure S15** Evolution of molar mass distribution for PS synthesised by NMP and one-pot SG1 removal with  $\text{CBr}_4$  (entry 14, Table S3).

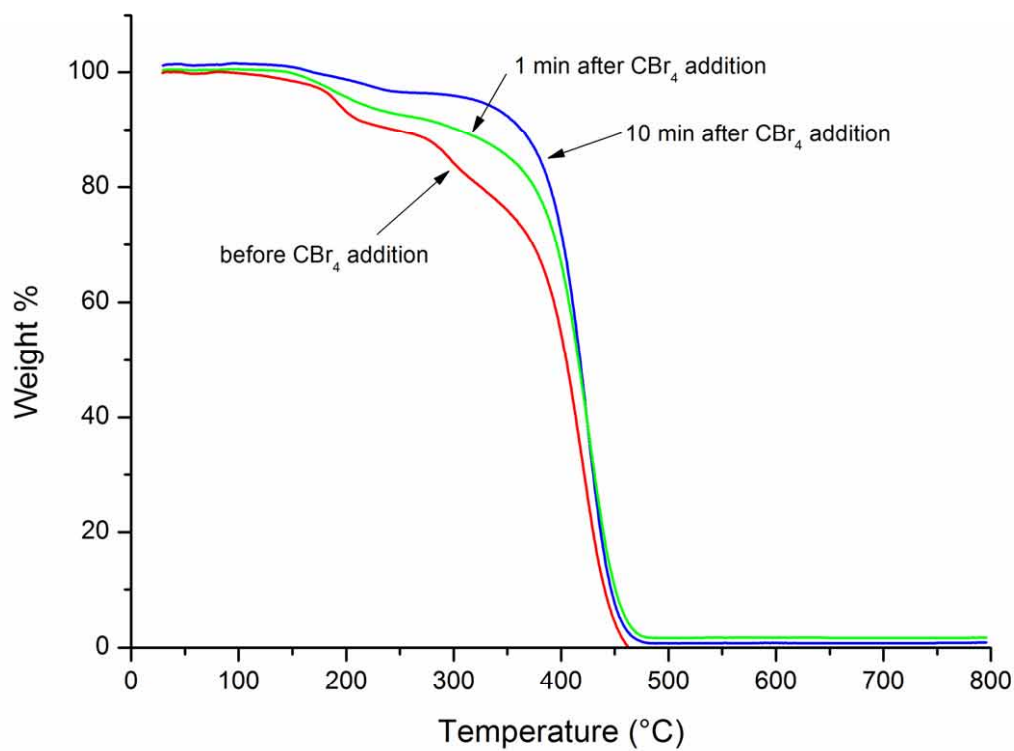

**Figure S16** TGA before, 1 min and 10 min after CBr<sub>4</sub> addition for PS synthesised with SG1 (entry 14, Table S3).

15: NMP of iBA and nitroxide removal in the presence of CBr<sub>4</sub>

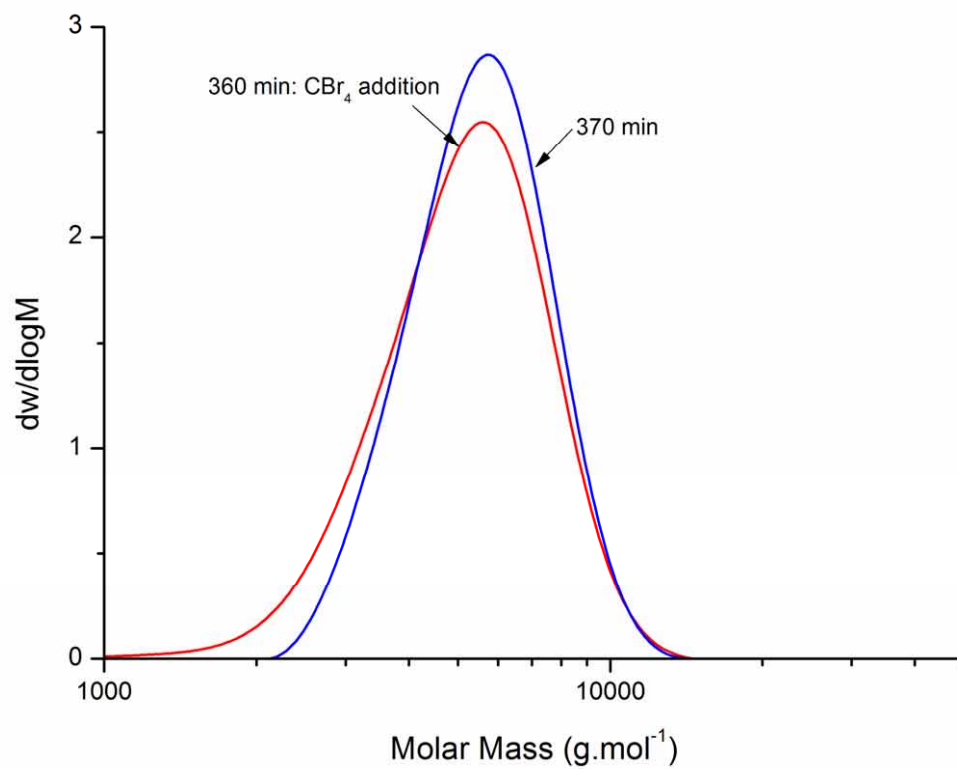

**Figure S17** Evolution of molar mass distribution for PiBA synthesised by NMP and one-pot SG1 removal with CBr<sub>4</sub> (entry 15, Table S3).

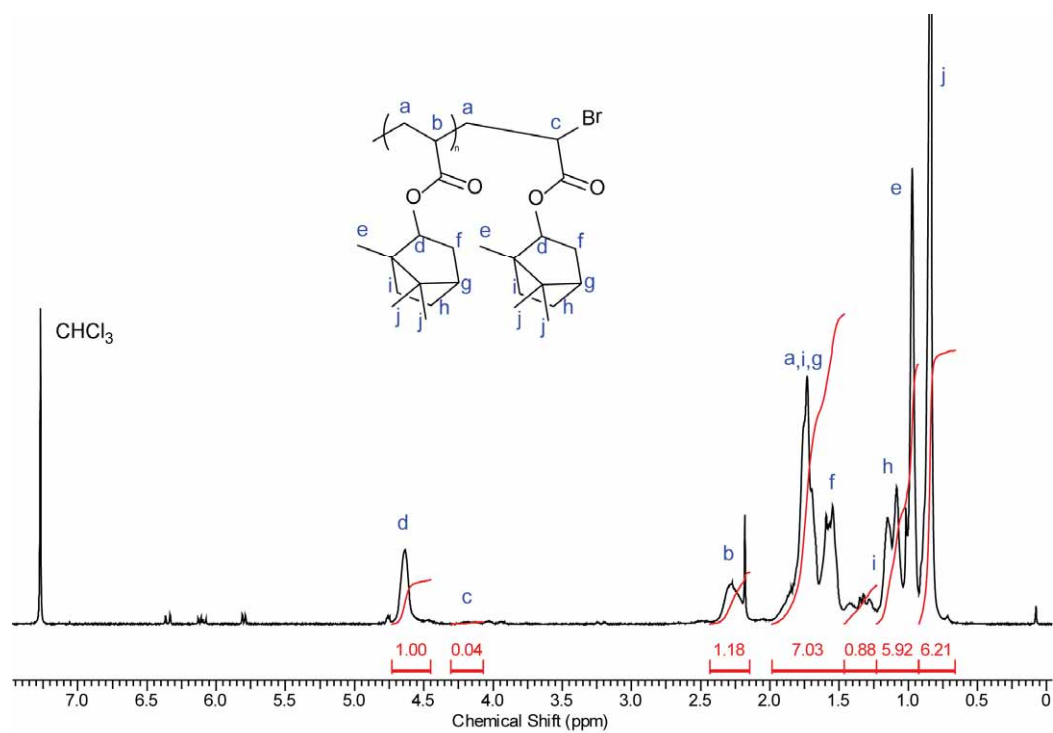

**Figure S18** <sup>1</sup>H NMR (500 MHz) for PiBA-Br 10 min after CBr<sub>4</sub> addition (entry 15, Table S3).

16: NMP of MMA and nitroxide removal in the presence of CBr<sub>4</sub>

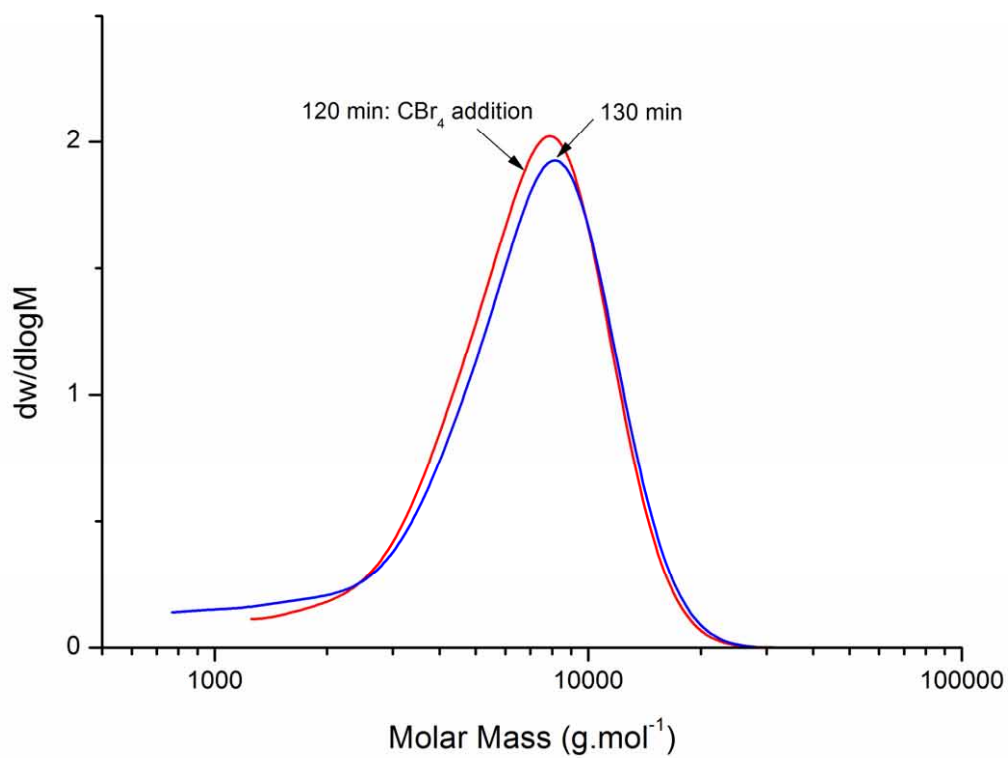

**Figure S19** Evolution of molar mass distribution for PMMA synthesised by NMP and one-pot SG1 removal with CBr<sub>4</sub> (entry 16, Table S3).

## Chain Extension by ATRP

**Table S4** Chain extension by ATRP with bromine terminated macroinitiators<sup>a</sup>.

| Entry | MI <sup>b</sup>       | M <sup>c</sup> | [M] <sub>0</sub> /[MI]/[Cu(I)Br]/<br>[PMDETA] | T<br>(K) | t<br>(min) | M <sub>n,i</sub> <sup>d</sup><br>(g.mol <sup>-1</sup> ) | PDI <sup>d</sup> | M <sub>n,f</sub> <sup>e</sup><br>(g.mol <sup>-1</sup> ) | PDI <sup>e</sup> | Conv <sup>f</sup><br>(%) |
|-------|-----------------------|----------------|-----------------------------------------------|----------|------------|---------------------------------------------------------|------------------|---------------------------------------------------------|------------------|--------------------------|
| 17    | PS-Br<br>(entry 13)   | S              | 300/1/1/1                                     | 383      | 360        | 10,000                                                  | 1.07             | 25,300                                                  | 1.18             | 57.2                     |
| 18    | PS-Br<br>(entry 14)   | S              | 300/1/1/1                                     | 383      | 360        | 3,800                                                   | 1.06             | 21,200                                                  | 1.31             | -                        |
| 19    | PiBA-Br<br>(entry 15) | iBA            | 300/1/1.5/1.5                                 | 348      | 1260       | 5,200                                                   | 1.12             | 7,000                                                   | 1.21             | -                        |
| 20    | PMMA-Br<br>(entry 16) | MMA            | 300/1/1/1                                     | 363      | 240        | 8,400                                                   | 1.20             | 30,200                                                  | 2.12             | -                        |
| 21    | PMMA-Br<br>(entry 16) | MMA            | 300/1/0.5/0.5                                 | 363      | 240        | 8,600                                                   | 1.17             | 28,600                                                  | 2.12             | -                        |

<sup>a</sup> A typical reaction procedure is given below for entry 17. <sup>b</sup> MI = macroinitiator. <sup>c</sup> M = monomer. <sup>d</sup> Molar mass and PDI of the macroinitiator. <sup>e</sup> Molar mass and PDI after chain extension. <sup>f</sup> - = not determined.

### 17: Chain extension of PS-Br (entry 13, Table S3) by ATRP

PS-Br (0.30068 g,  $2.91 \times 10^{-5}$  mol), styrene (1 mL,  $8.70 \times 10^{-3}$  mol), and PMDETA (6  $\mu$ L,  $2.90 \times 10^{-5}$  mol) were mixed and stirred during 30 min in order to dissolve the PS-Br macroinitiator in the monomer. Then, the mixture was transferred to the Schlenk reactor and degassed by three freeze-pump-thaw cycles. Subsequently, it was backfilled with nitrogen and Cu(I)Br (0.00440 g,  $3.06 \times 10^{-5}$  mol) was added under a smooth nitrogen flow. The initial colourless mixture turned pale green after the addition of Cu(I)Br. One aliquot of this mixture was taken for analysis and the reaction flask was placed in an oil bath set at 383 K. Samples were withdrawn from the reaction system at 1 h intervals in order to determine the conversion and the polymer properties. The samples were dissolved in THF in order to perform SEC analysis. After 6 h, the ATRP experiment was terminated by quenching the reaction mixture with liquid nitrogen. After dissolution in THF, passing over a neutral aluminium oxide column to remove copper and evaporation of the solvent, the polymer was precipitated in a 10-fold excess of methanol.

**18: Chain extension of PS-Br (entry 14, Table S3) by ATRP**

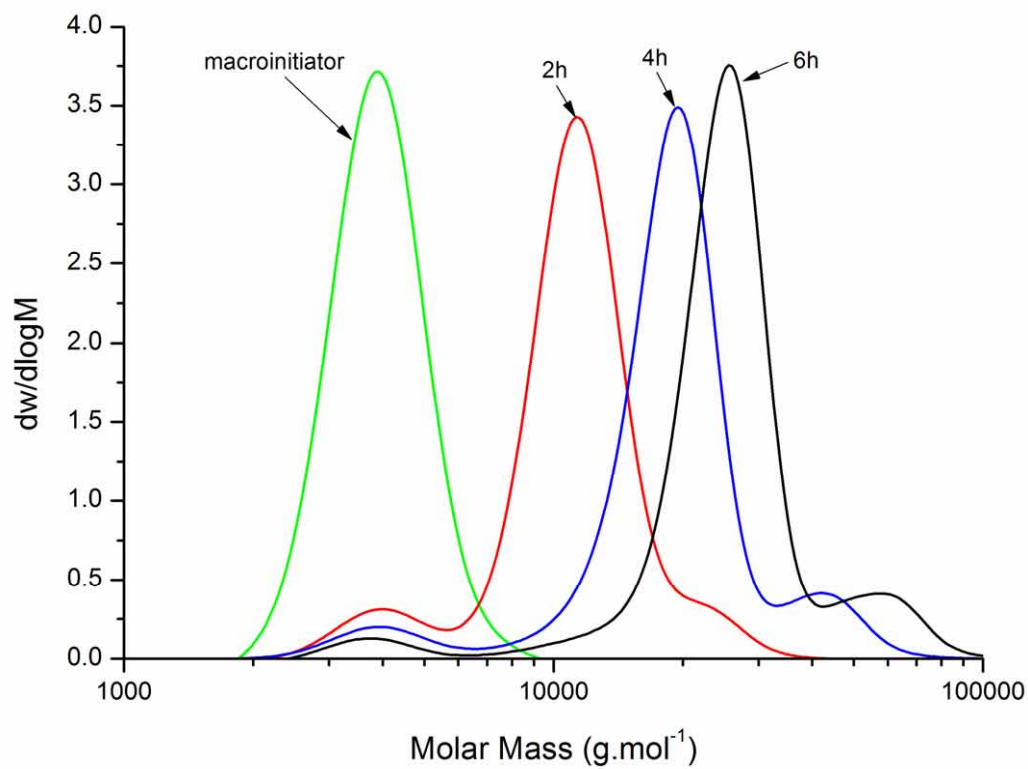

**Figure S20** Molar mass distribution before and 2h, 4h and 6h after chain extension of a PS-Br macroinitiator by ATRP (entry 18, Table S4).



**19: Chain extension of PiBA-Br (entry 15, Table S3) by ATRP**

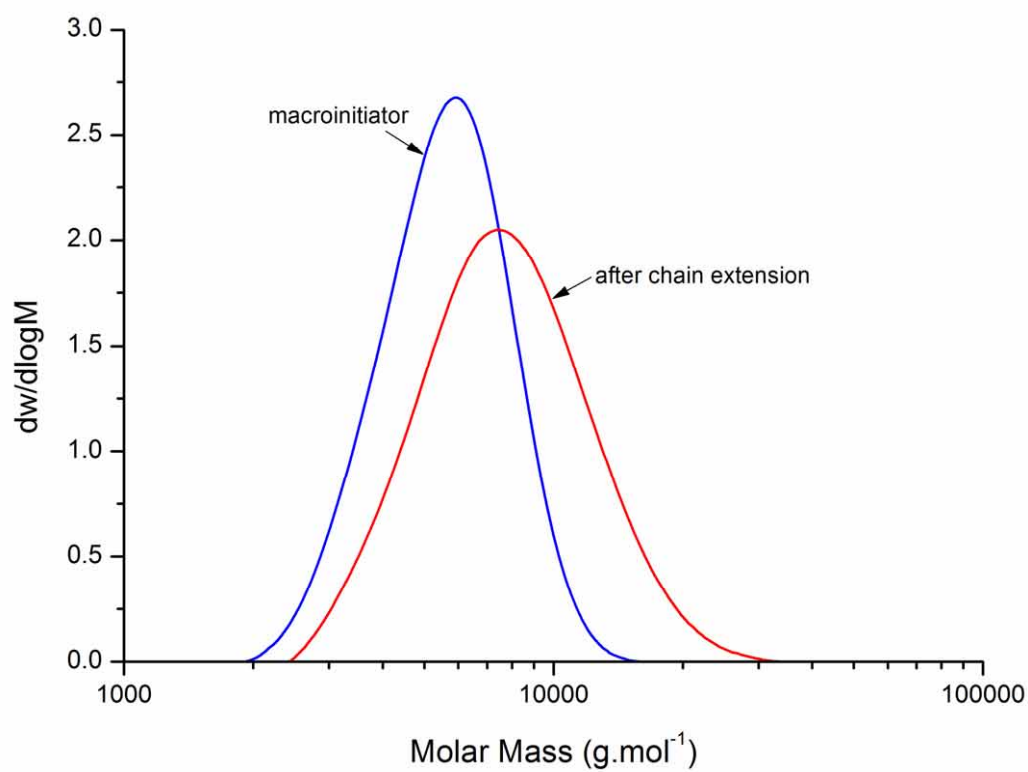

**Figure S21** Molar mass distribution before (left) and after (right) chain extension of a PiBA-Br macroinitiator by ATRP (entry 19, Table S4).

20: Chain extension of PMMA-Br (entry 16, Table S3) by ATRP

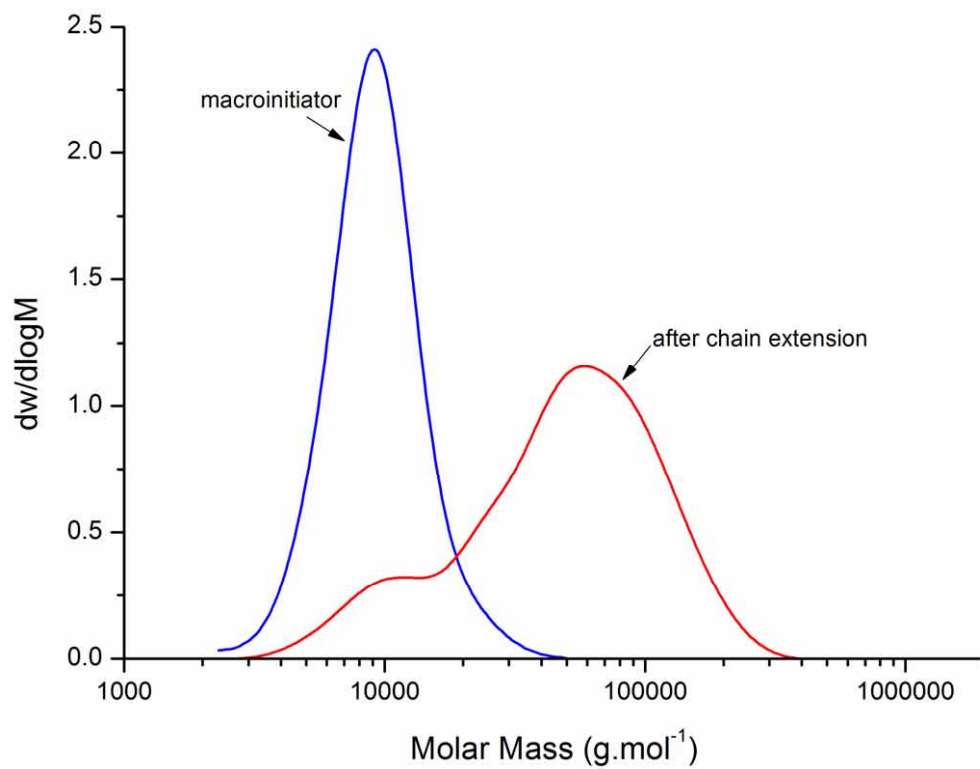

**Figure S22** Molar mass distribution before (left) and after (right) chain extension of a PMMA-Br macroinitiator by ATRP (entry 20, Table S4).

**21: Chain extension of PMMA-Br (entry 16, Table S3) by ATRP**

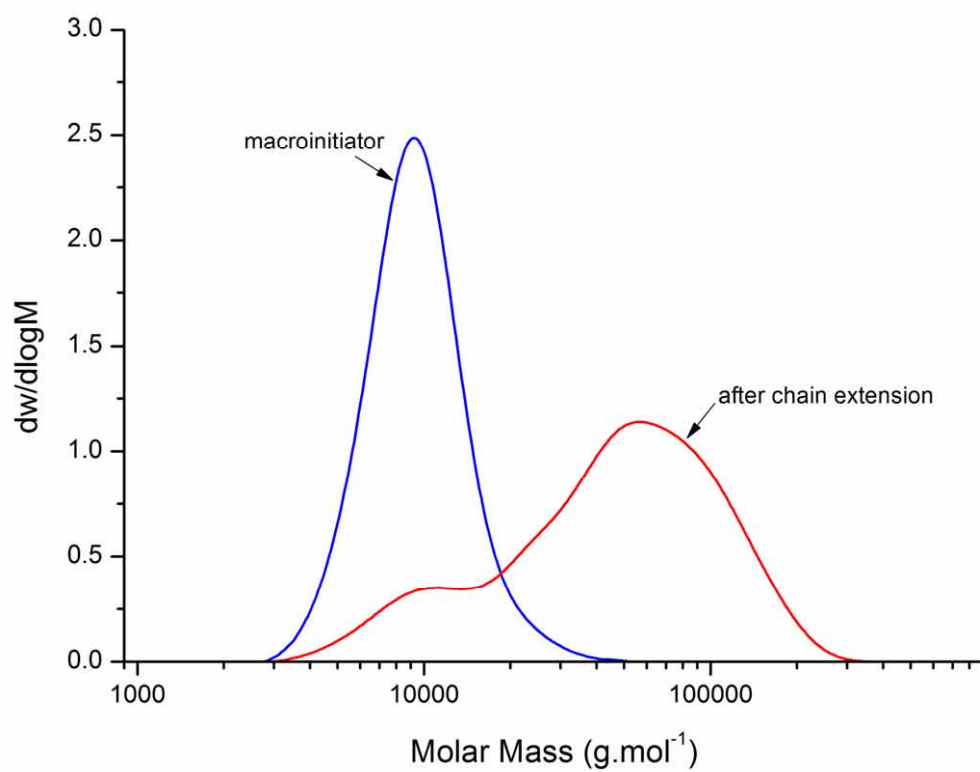

**Figure S23** Molar mass distribution before (left) and after (right) chain extension of a PMMA-Br macroinitiator by ATRP (entry 21, Table S4).
